# Supplementary material
Source: HighWire-hosted journal article supplement (https://thorax.bmj.com/highwire/filestream/174411/field_highwire_adjunct_files/0/Thorax_Appendix_160168.docx)
Supplement: Thorax_Appendix_160168.docx [file Thorax_Appendix_160168.docx]

**Supplement Table 1: Clinical and Immunological Characteristics of Asymptomatic TB cases**

Key: N/A not available; LOA loss of appetite; LOW loss of weight; NS night sweats; Bilat. Hilar bilateral hilar; L.N. lymphadenopathy; LUZ left upper zone; MDR multi-drug resistant; Neg negative; Pos positive.

| n | Age | Sex | Symptoms at Baseline | Symptoms Developed | CXR | TST (mm) | Sputum Smear | Days to Culture  Positivity | CD4 count | Past TB | TB Contact in past 1 year | Spoligo Family | Date of Sputum Collection |
| --- | --- | --- | --- | --- | --- | --- | --- | --- | --- | --- | --- | --- | --- |
| 1 | 29 | F | None | LOA, Diarrhoea 10 days later; Disseminated TB | N/A | 4 | Neg | 12 | 12 | N | N | *M.tb.* T1 | 20/05/2008 |
| 2 | 26 | F | None | LOW, LOA, NS, Fatigue 3 weeks later | Normal | 20 | Pos | 14 | 332 | N | N | *M.tb.* Beijing | 2/10/2008 |
| 3 | 38 | F | None | None | Normal | 20 | Neg | 17 | 79 | N | Y | Family 35 | 3/10/2008 |
| 4 | 40 | M | None | None | N/A | 2 | Neg | 7 | 170 | Y | N | *M.tb.* T1 | 14/11/2008 |
| 5 | 35 | F | None | Cough, Fevers, NS 4 weeks later | Normal | 19 | Neg | 13 | 247 | N | Y | *M.tb.* CAS | 23/10/2008 |
| 6 | 21 | F | None | None | Bilat. Hilar L.N. | 20 | Neg | 43 | 569 | N | N | *M.tb.* S | 3/11/2008 |
| 7 | 45 | F | None | Cough, Fatigue 5 weeks later | Normal | 50 | Neg | 17 | 234 | N | N | *M.tb.* S | 22/01/2009 |
| 16 | 34 | F | Cellulitis left elbow | Cold abscess left elbow 2 months later, Repeat CXR at 2 months showed hilar adenopathy | Normal | 20 | Neg | MDR TB grown from abscess aspirate | 187 | N | N | Unable to retrieve isolate for spoligoty-ping | 01/02/2009 |
| 8 | 34 | F | None | Follow up n/a | LUZ infiltrate | 20 | Neg | 11 | 282 | N | N | LAM 3 | 30/01/2009 |
| 9 | 27 | F | None | NS 4 weeks later | Normal | 20 | Neg | 27 | 646 | N | N | *M.tb.* Beijing | 04/03/2009 |
| 10 | 36 | F | None | Cough 4 days later | Right hilar L.N | 25 | Pos | 6 | 106 | Y | N | LAM 3 | 01/06/2009 |
| 11 | 34 | M | None | Cough, Haemoptysis, NS, LOA 4 weeks later | Normal | 17 | Neg | 43 | 292 | Y | N | *M.tb.* CAS | 12/06/2009 |
| 12 | 39 | F | None | None | Normal | 22 | Neg | 20 | 255 | N | N | LAM 3 | 07/08/2009 |
| 17 | 35 | F | None | None | Lung infiltrate and hilar L.N. | 22 | Neg | N/A | 170 | N | N | Culture neg | 07/09/2009 (TB diagnosis made on CXR) |
| 13 | M | 43 | None | Cough, LOW, LOA 3 days later | N/A | 2 | Pos | 7 | 11 | N | N | *M.tb.* Haarlem | 14/10/2009 |
| 14 | 32 | F | None | None | Normal | 22 | Neg | 22 | 340 | N | Y | *M.tb.* H37RV | 19/10/2009 |
| 15 | 26 | F | None | None | Normal | 10 | Neg | 38 | 396 | Y | Y | *M.tb.* X1 | 20/11/2009 |
| 18 | 26 | F | None | Follow up n/a | N/A | 0 | Pos | 12 | 250 | N | N | *M.tb.* S | 10/03/2010 |
